# Supplementary material for: Co-Effects of Hydrological Conditions and Industrial Activities on the Distribution of Heavy Metal Pollution in Taipu River, China
Source: MDPI journal article supplement (doi:10.3390/ijerph191610116), 2022-08-16
Supplement: s1 [file s1]

# Supplementary Material

## Co-effects of hydrological conditions and industrial activities on the distribution of heavy metal pollution in Taipu River, China

Qinglu Yao <sup>1</sup>, Ling Chen <sup>1,2</sup>, Lingchen Mao <sup>3</sup>, Yu Ma <sup>1</sup>, Fengyan Tian <sup>3</sup>, Ruijie Wang <sup>3</sup>,  
Xiangzhou Meng <sup>1,4</sup>, and Feipeng Li <sup>3,\*</sup>

<sup>1</sup> College of Environmental Science and Engineering, Tongji University, Shanghai 200092, China

<sup>2</sup> State Key Laboratory of Pollution Control and Resource Reuse, Tongji University, Shanghai 200092, China

<sup>3</sup> School of Environment and Architecture, University of Shanghai for Science and Technology, Shanghai 200093, China

<sup>4</sup> Shanghai Institute of Pollution Control and Ecological Security, Shanghai 200092, China

\* Correspondence: lifeipeng@usst.edu.cn

**Table S1.** The MDL value (mg·kg<sup>-1</sup>) of heavy metals.

|     | Sb   | Cd   | Cr  | Cu   | Zn | As | Pb   |
|-----|------|------|-----|------|----|----|------|
| MDL | 0.02 | 0.01 | 8.1 | 0.19 | 24 | 17 | 0.10 |

**Table S2.** The  $I_{geo}$  value level classification criteria.

| Range                | Degree                  |
|----------------------|-------------------------|
| $I_{geo} \leq 0$     | No pollution            |
| $0 < I_{geo} \leq 1$ | Light- Medium pollution |
| $1 < I_{geo} \leq 2$ | Medium pollution        |

**Table S3.** The  $I_{\text{geo}}$  value of sediments in Taipu River.

|      | Sb    | Cd    | Cr    | Cu    | Zn    | As    | Pb    |
|------|-------|-------|-------|-------|-------|-------|-------|
| Mean | 0.48  | 0.89  | -1.18 | 0.32  | 0.44  | -0.84 | 0.27  |
| Max  | 2.20  | 2.44  | -0.09 | 3.63  | 1.86  | 1.23  | 1.03  |
| Min  | -1.39 | -1.06 | -2.46 | -2.04 | -1.86 | -3.00 | -1.06 |

**Table S4.** Heavy metals average concentration (mg·kg<sup>-1</sup>) in part of Taipu River.

|    |            | Sb   | Cd   | Cr    | Cu     | Zn     | As    | Pb    |
|----|------------|------|------|-------|--------|--------|-------|-------|
| MS | Upstream   | 1.58 | 0.23 | 50.78 | 48.12  | 113.29 | 7.36  | 38.50 |
|    | Midstream  | 1.85 | 0.29 | 53.15 | 72.09  | 165.83 | 8.61  | 44.64 |
|    | Downstream | 1.34 | 0.19 | 56.19 | 51.14  | 135.07 | 6.14  | 40.98 |
| CL | N1         | 3.35 | 0.16 | 57.71 | 40.86  | 121.80 | 8.71  | 36.99 |
|    | S1         | 0.98 | 0.15 | 64.69 | 41.11  | 101.72 | 2.98  | 30.33 |
|    | S2         | 2.10 | 0.29 | 63.46 | 48.01  | 179.78 | 11.54 | 51.27 |
|    | S3         | 2.46 | 0.34 | 72.29 | 54.89  | 231.55 | 13.28 | 56.90 |
|    | S4         | 1.99 | 0.28 | 63.77 | 157.83 | 232.90 | 10.21 | 53.41 |

**Table S5.** Lead isotopic compositions in several material sources from China.

| Sample               | $^{206}\text{Pb}/^{207}\text{Pb}$ | $^{208}\text{Pb}/^{206}\text{Pb}$ | References    |
|----------------------|-----------------------------------|-----------------------------------|---------------|
| Sample-April, 2021   | 1.169                             | 2.101                             | Present study |
|                      | 1.169                             | 2.107                             |               |
|                      | 1.174                             | 2.098                             |               |
|                      | 1.169                             | 2.096                             |               |
|                      | 1.164                             | 2.118                             |               |
|                      | 1.172                             | 2.103                             |               |
|                      | 1.168                             | 2.114                             |               |
|                      | 1.174                             | 2.107                             |               |
| Sample-January, 2021 | 1.176                             | 2.110                             | Present study |
|                      | 1.186                             | 2.092                             |               |
|                      | 1.179                             | 2.094                             |               |
|                      | 1.180                             | 2.095                             |               |
|                      | 1.176                             | 2.107                             |               |
|                      | 1.179                             | 2.102                             |               |
|                      | 1.179                             | 2.100                             |               |
|                      | 1.179                             | 2.092                             |               |
|                      | 1.171                             | 2.112                             |               |
|                      | 1.175                             | 2.110                             |               |
|                      | 1.174                             | 2.102                             |               |
|                      | 1.176                             | 2.104                             |               |
|                      | 1.178                             | 2.106                             |               |
|                      | 1.178                             | 2.108                             |               |
|                      | 1.173                             | 2.105                             |               |
|                      | 1.175                             | 2.107                             |               |
|                      | 1.165                             | 2.114                             |               |
|                      | 1.182                             | 2.091                             |               |
|                      | 1.175                             | 2.105                             |               |
|                      | 1.177                             | 2.107                             |               |
|                      | 1.182                             | 2.098                             |               |
|                      | 1.178                             | 2.104                             |               |
| Coals-Jiangsu        | 1.172                             | 2.106                             | [1]           |
|                      | 1.171                             | 2.110                             |               |
|                      | 1.166                             | 2.119                             |               |
| Coals-Shanghai       | 1.163                             | 2.111                             | [1]           |
| Gasoline-Shanghai    | 1.143                             | 2.150                             | [2]           |
|                      | 1.135                             | 2.139                             |               |
|                      | 1.136                             | 2.146                             | [3]           |
|                      | 1.147                             | 2.124                             |               |
|                      | 1.143                             | 2.113                             |               |
|                      | 1.145                             | 2.126                             |               |
|                      | 1.147                             | 2.124                             | [1]           |
|                      | 1.114                             | 2.139                             |               |
|                      | 1.113                             | 2.141                             |               |
| Diesel               | 1.149                             | 2.118                             | [4]           |
|                      | 1.147                             | 2.122                             |               |
|                      | 1.148                             | 2.135                             |               |
|                      | 1.163                             | 2.123                             |               |

| Sample             | $^{206}\text{Pb}/^{207}\text{Pb}$ | $^{208}\text{Pb}/^{206}\text{Pb}$ | References |
|--------------------|-----------------------------------|-----------------------------------|------------|
| natural background | 1.183                             | 2.086                             | [5]        |
|                    | 1.184                             | 2.096                             |            |
|                    | 1.199                             | 2.082                             |            |
|                    | 1.193                             | 2.092                             |            |
| Yangtze sediments  | 1.184                             | 2.090                             | [6]        |
|                    | 1.180                             | 2.093                             |            |
|                    | 1.184                             | 2.089                             |            |
|                    | 1.186                             | 2.089                             |            |
|                    | 1.188                             | 2.085                             |            |
|                    | 1.189                             | 2.083                             |            |
|                    | 1.182                             | 2.092                             |            |
|                    | 1.191                             | 2.083                             |            |
|                    | 1.182                             | 2.091                             |            |
|                    | 1.186                             | 2.089                             |            |
|                    | 1.183                             | 2.091                             |            |

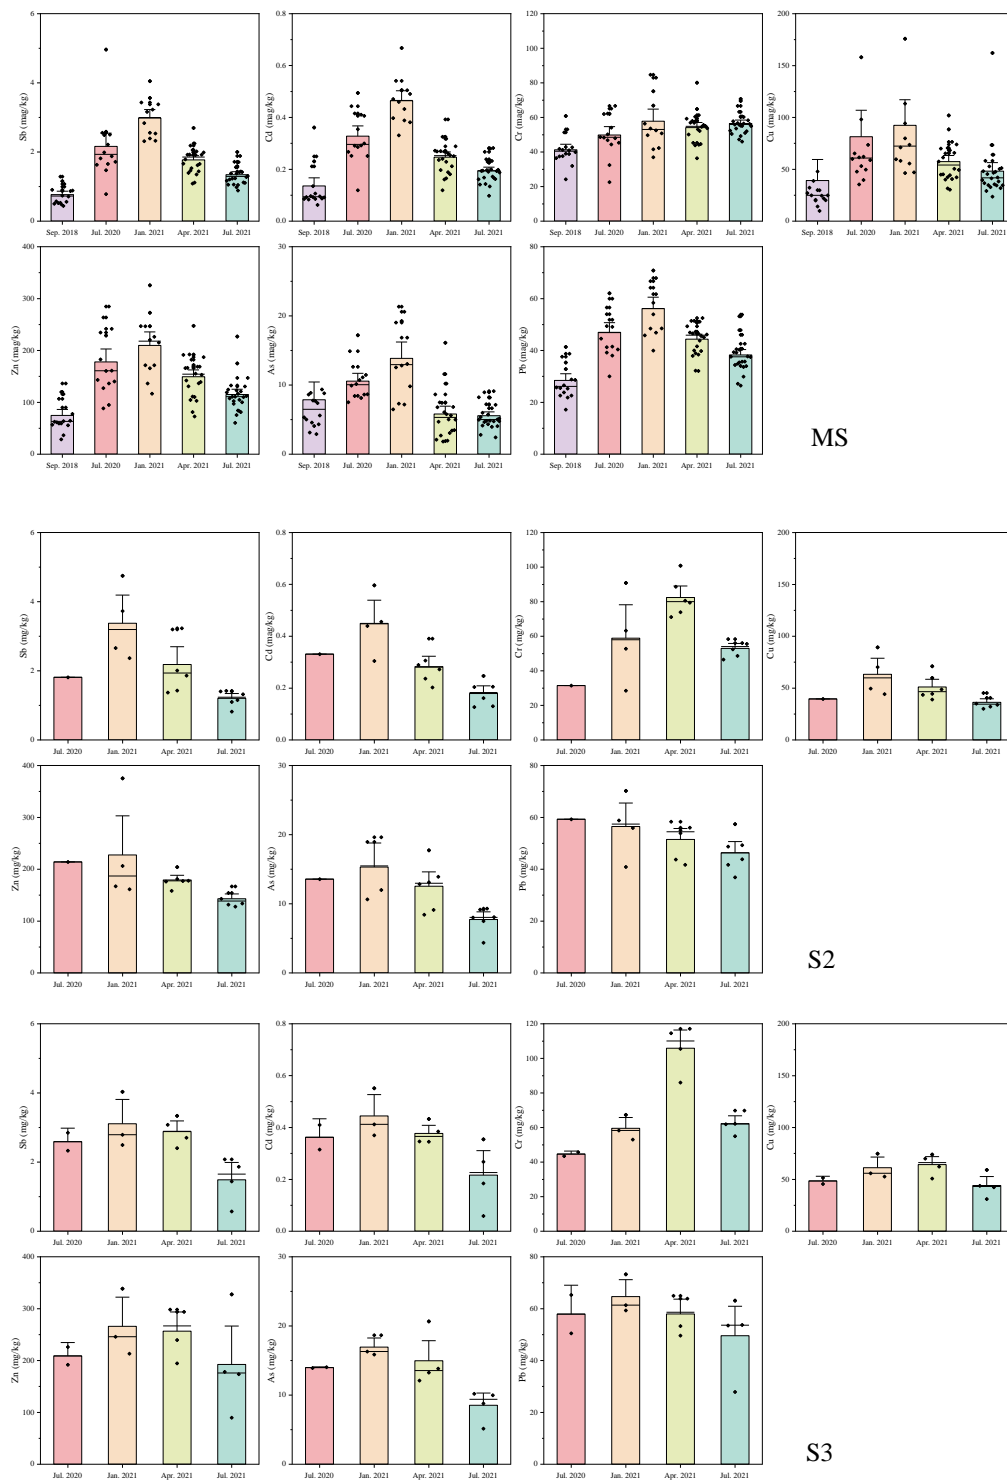

**Figure S1.** Temporal distribution of heavy metals in sediments of the Taipu River MS, S2, S3.



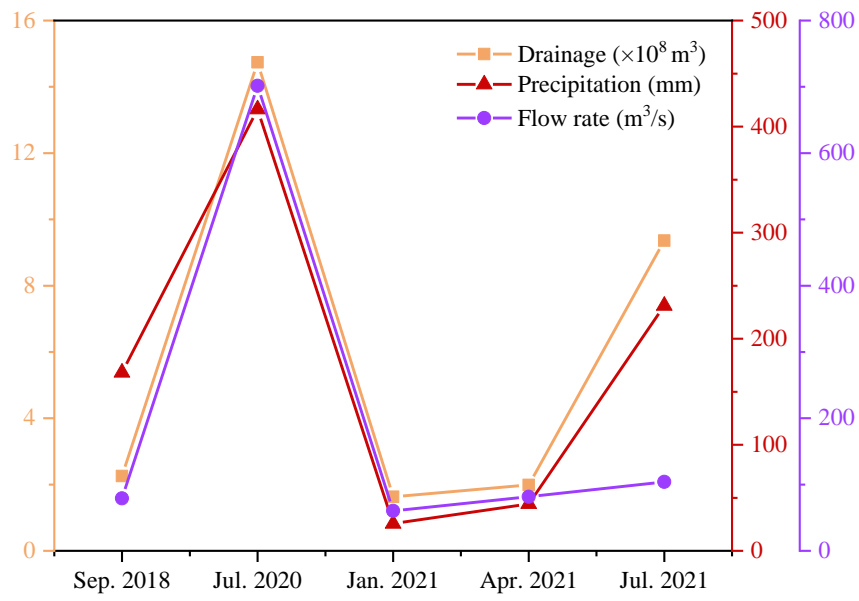

**Figure S2.** Variations of precipitation, drainage, and flow rates in the Taipu River.

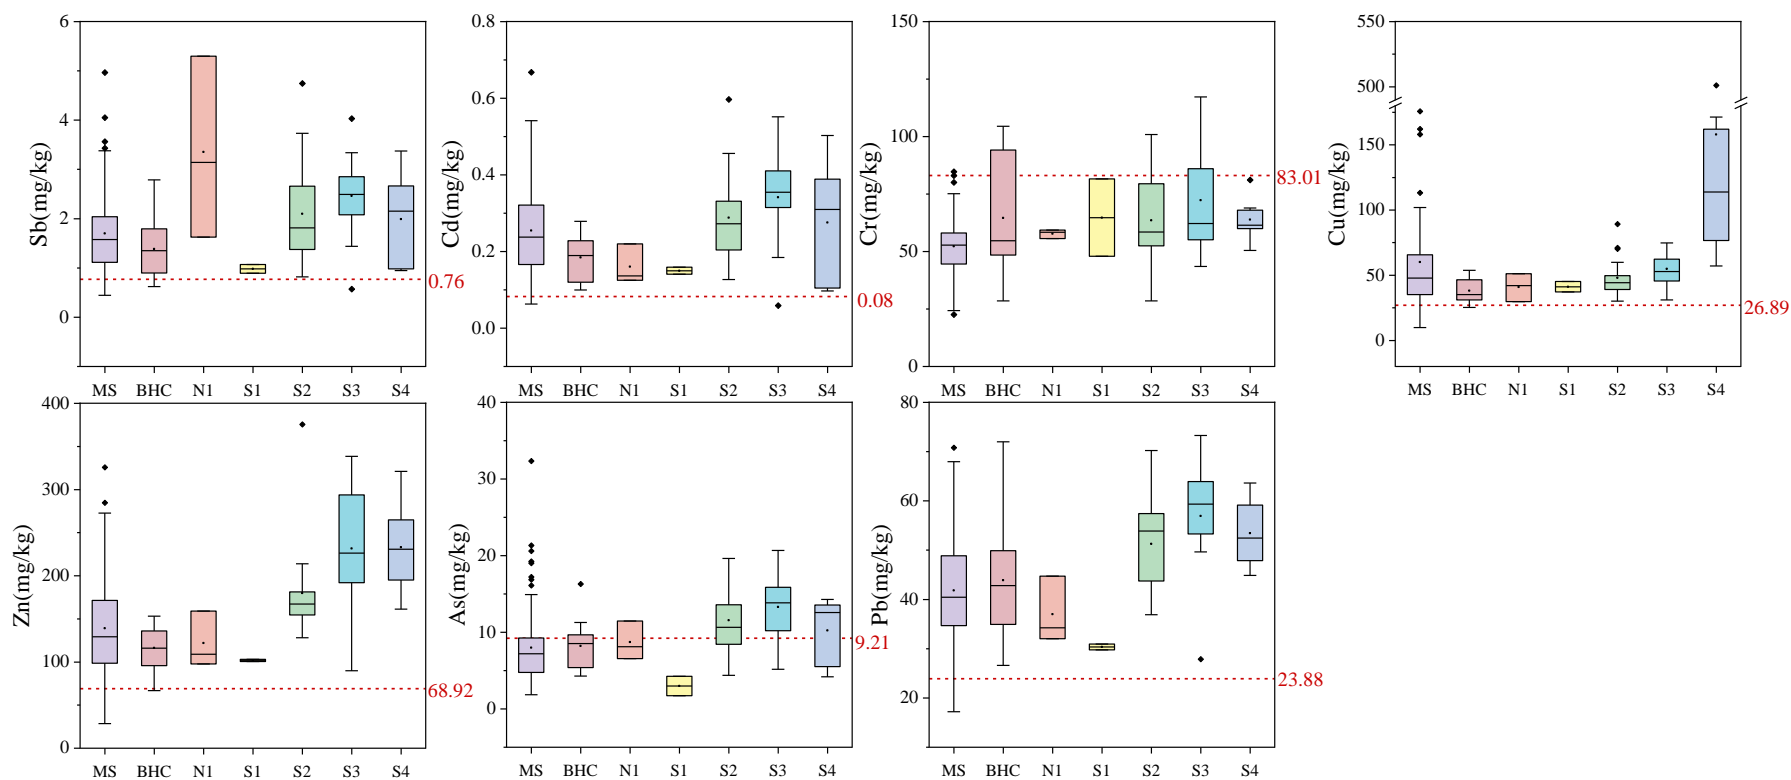

**Figure S3.** Spatial distribution of heavy metals in sediments (The red dashed line represented the background value of each heavy metal).

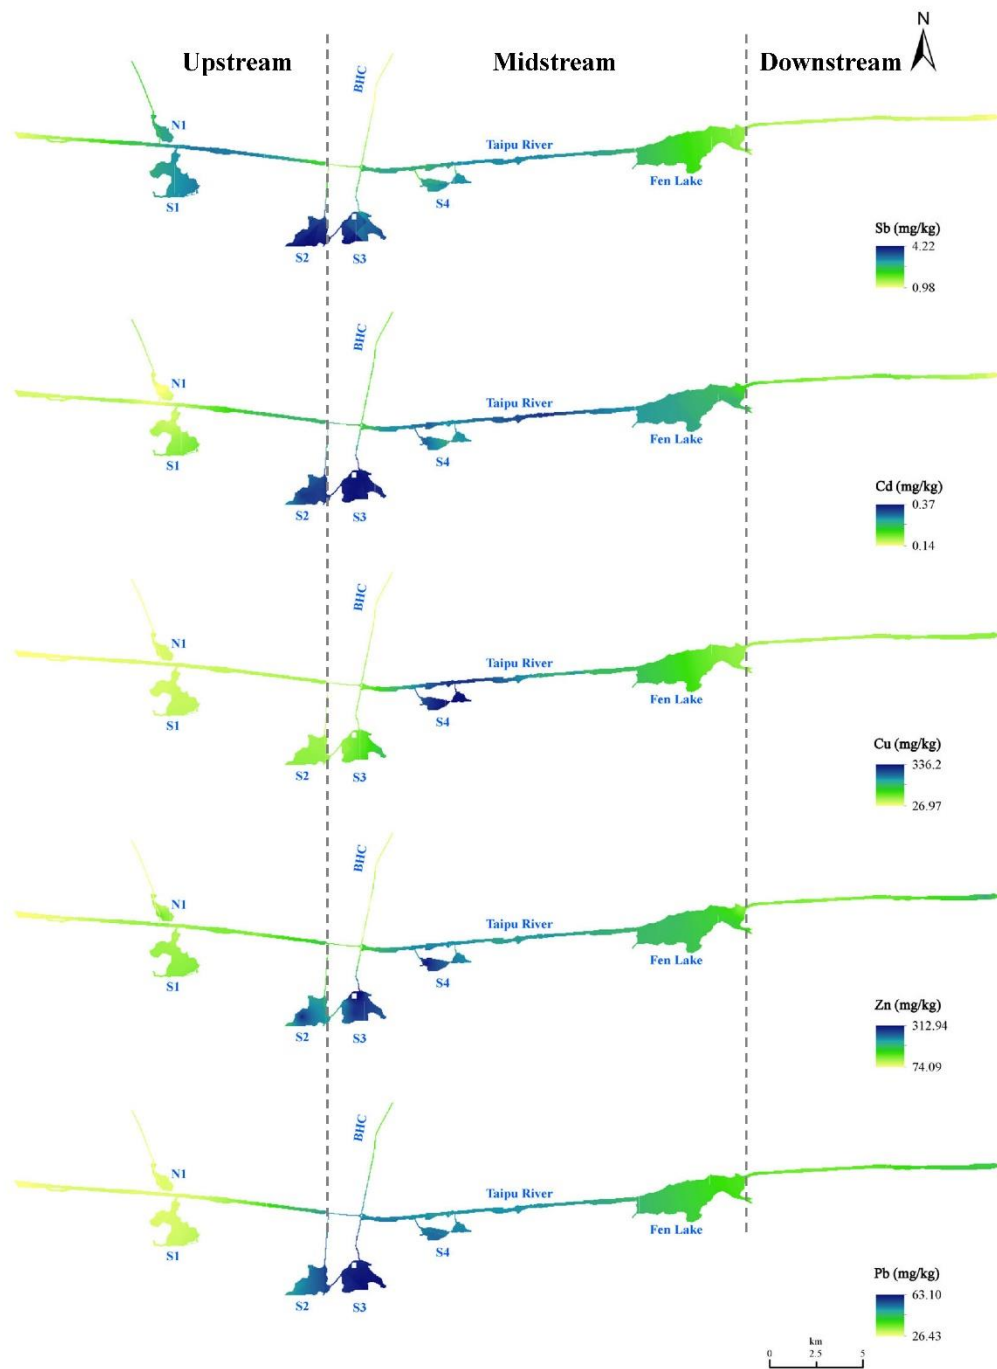

**Figure S4.** Spatial distribution of Sb, Cd, Cu, Zn, and Pb in Taipu River sediments.

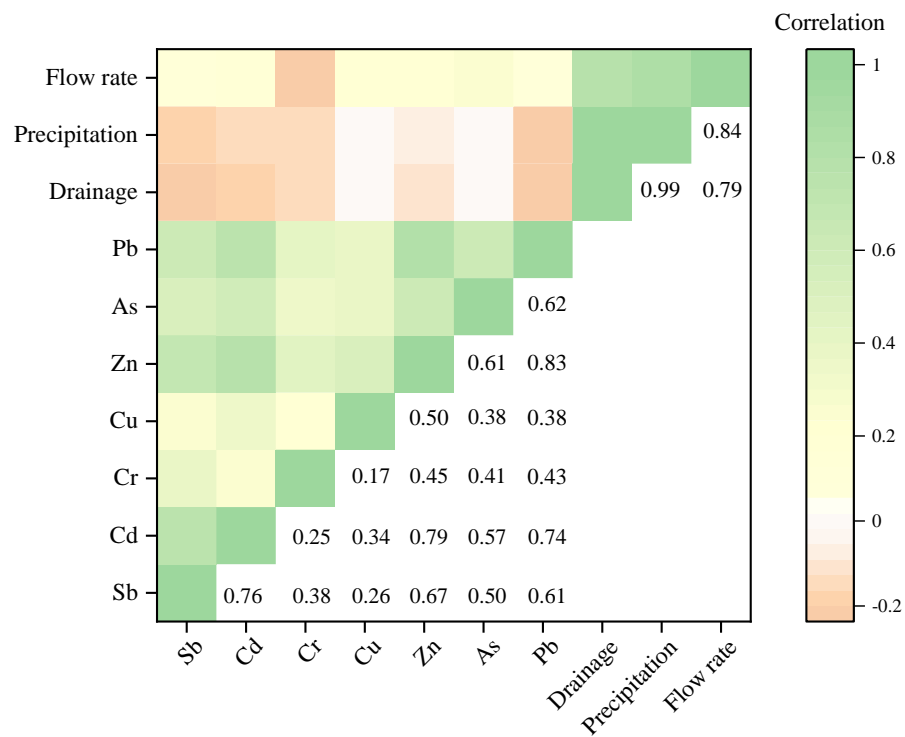

**Figure S5.** Pearson correlations among target metal elements and hydrological conditions in the Taipu River.

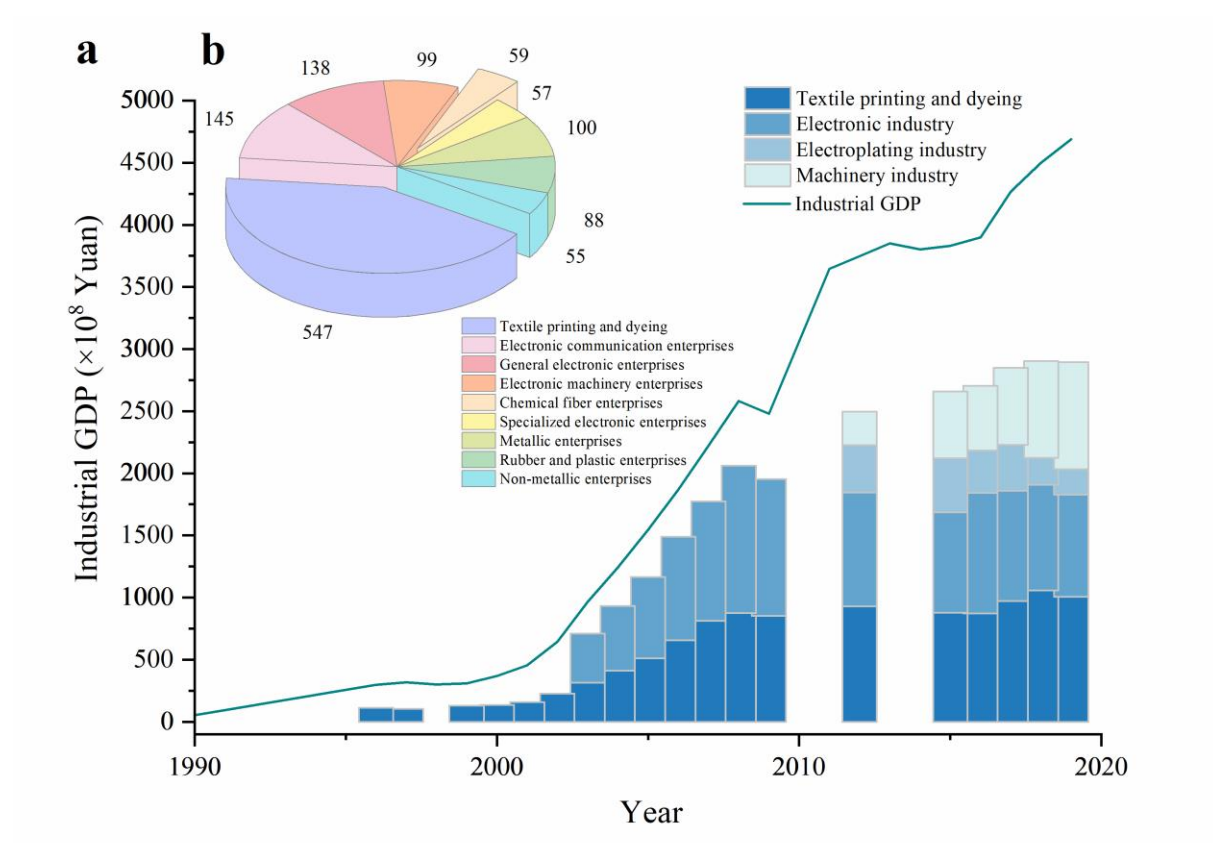

**Figure S6.** (a) Temporal trends of industrial and major industrial output values in Wujiang from 1990 to 2019 (b) Distribution of industrial enterprise types in Wujiang.

## References

1. Tan, M. G.; Zhang, G. L.; Li, X. L.; Zhang, Y. X.; Yue, W. S.; Chen, J. M.; Wang, Y. S.; Li, A. G.; Li, Y.; Zhang, Y. M.; Shan, Z. C., Comprehensive study of lead pollution in Shanghai by multiple techniques. *Anal. Chem.* **2006**, *78* (23), 8044-8050.
2. Zheng, J.; Tan, M. G.; Shibata, Y.; Tanaka, A.; Li, Y.; Zhang, G. L.; Zhang, Y. M.; Shan, Z., Characteristics of lead isotope ratios and elemental concentrations in PM10 fraction of airborne particulate matter in Shanghai after the phase-out of leaded gasoline. *Atmospheric Environment* **2004**, *38* (8), 1191-1200.
3. Chen, J. M.; Tan, M. G.; Li, Y. L.; Zhang, Y. M.; Lu, W. W.; Tong, Y. P.; Zhang, G. L.; Li, Y., A lead isotope record of shanghai atmospheric lead emissions in total suspended particles during the period of phasing out of leaded gasoline. *Atmospheric Environment* **2005**, *39* (7), 1245-1253.
4. Bi, X.; Li, Z.; Wang, S.; Zhang, L.; Xu, R.; Liu, J.; Yang, H.; Guo, M., Lead Isotopic Compositions of Selected Coals, Pb/Zn Ores and Fuels in China and the Application for Source Tracing. *Environ. Sci. Technol.* **2017**, *51* (22), 13502-13508.
5. Zhu, B. Q.; Chen, Y. W.; Peng, J. H., Lead isotope geochemistry of the urban environment in the Pearl River Delta. *Appl. Geochem.* **2001**, *16* (4), 409-417.
6. Choi, M.; Yi, H.; Yang, S. Y.; Lee, C.; Cha, H., Identification of Pb sources in Yellow Sea sediments using stable Pb isotope ratios. *Mar. Chem.* **2007**, *107* (2), 255-274.
